# Supplementary material for: Chromocene in porous polystyrene: an example of organometallic chemistry in confined spaces
Source: Royal Society of Chemistry journal article supplement (doi:10.1039/b814109f), 2009-01-01
Supplement: b814109f.pdf [file b814109f.pdf]

## **Supporting Information**

### **Chromocene in porous polystyrene:**

#### **an example of organometallic chemistry in confined spaces**

*Jane Estephane,<sup>a,b</sup> Elena Groppo,<sup>\*a</sup> Jenny G. Vitillo,<sup>a</sup> Alessandro Damin,<sup>a</sup> Carlo  
Lamberti,<sup>a</sup> Silvia Bordiga<sup>a</sup> and Adriano Zecchina<sup>\*a</sup>*

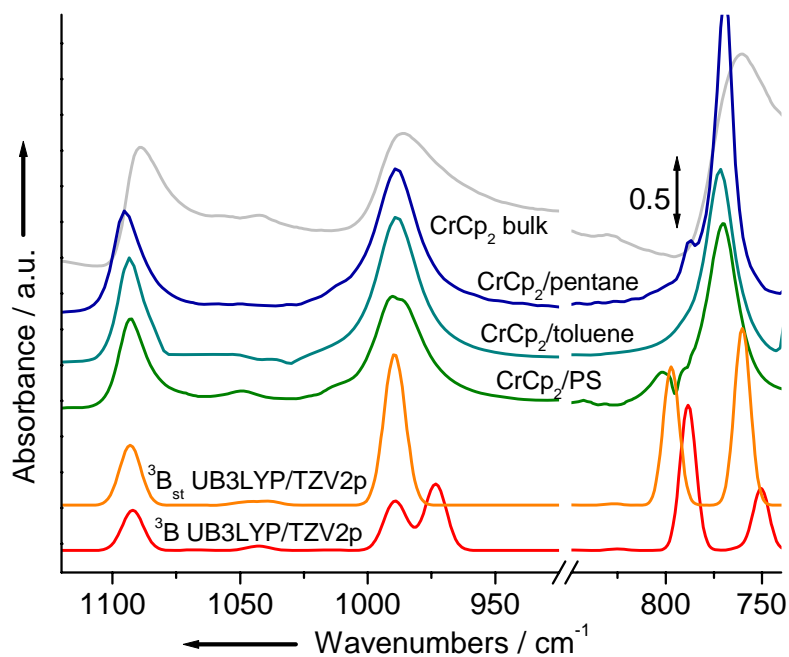

Figure S1. Top: IR spectra, in the 1120-750 cm<sup>-1</sup> region, of CrCp<sub>2</sub>/PS compared to that of bulk CrCp<sub>2</sub> and to those of CrCp<sub>2</sub> in solution of pentane and toluene. The spectrum of CrCp<sub>2</sub>/PS is background subtracted using as background the spectrum of PS before CrCp<sub>2</sub> sublimation. Bottom: computed infrared spectra for the <sup>3</sup>B and <sup>3</sup>B<sub>st</sub> chromocene conformers as obtained at the UB3LYP level. A scaling factor of 0.973 has been adopted, in order to align the band around 1100 cm<sup>-1</sup>.

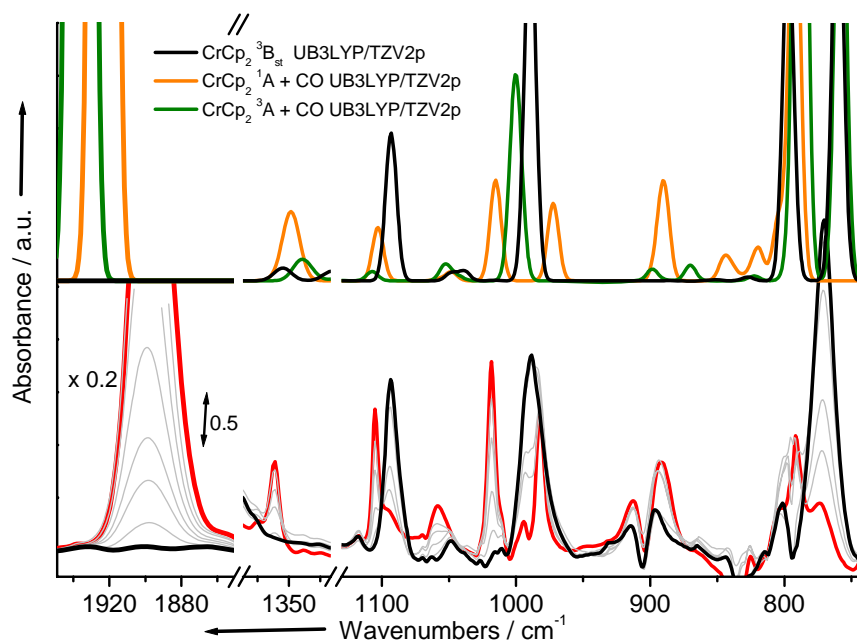

Figure S2. Bottom: from bold black to bold red, evolution of FTIR spectra of the CrCp<sub>2</sub>/PS system upon increasing P<sub>CO</sub> at 77 K. The frequency regions of CO stretching (left) and Cp deformations (right) are shown. All spectra are background subtracted using as background the spectrum of PS before CrCp<sub>2</sub> sublimation. Top: simulated IR spectra for the <sup>3</sup>Cp<sub>2</sub>Cr...CO (green) and <sup>1</sup>Cp<sub>2</sub>Cr...CO (orange) adducts as obtained at the UB3LYP level. A scaling factor of 0.973 has been adopted, in order to align the band around 1100 cm<sup>-1</sup>.

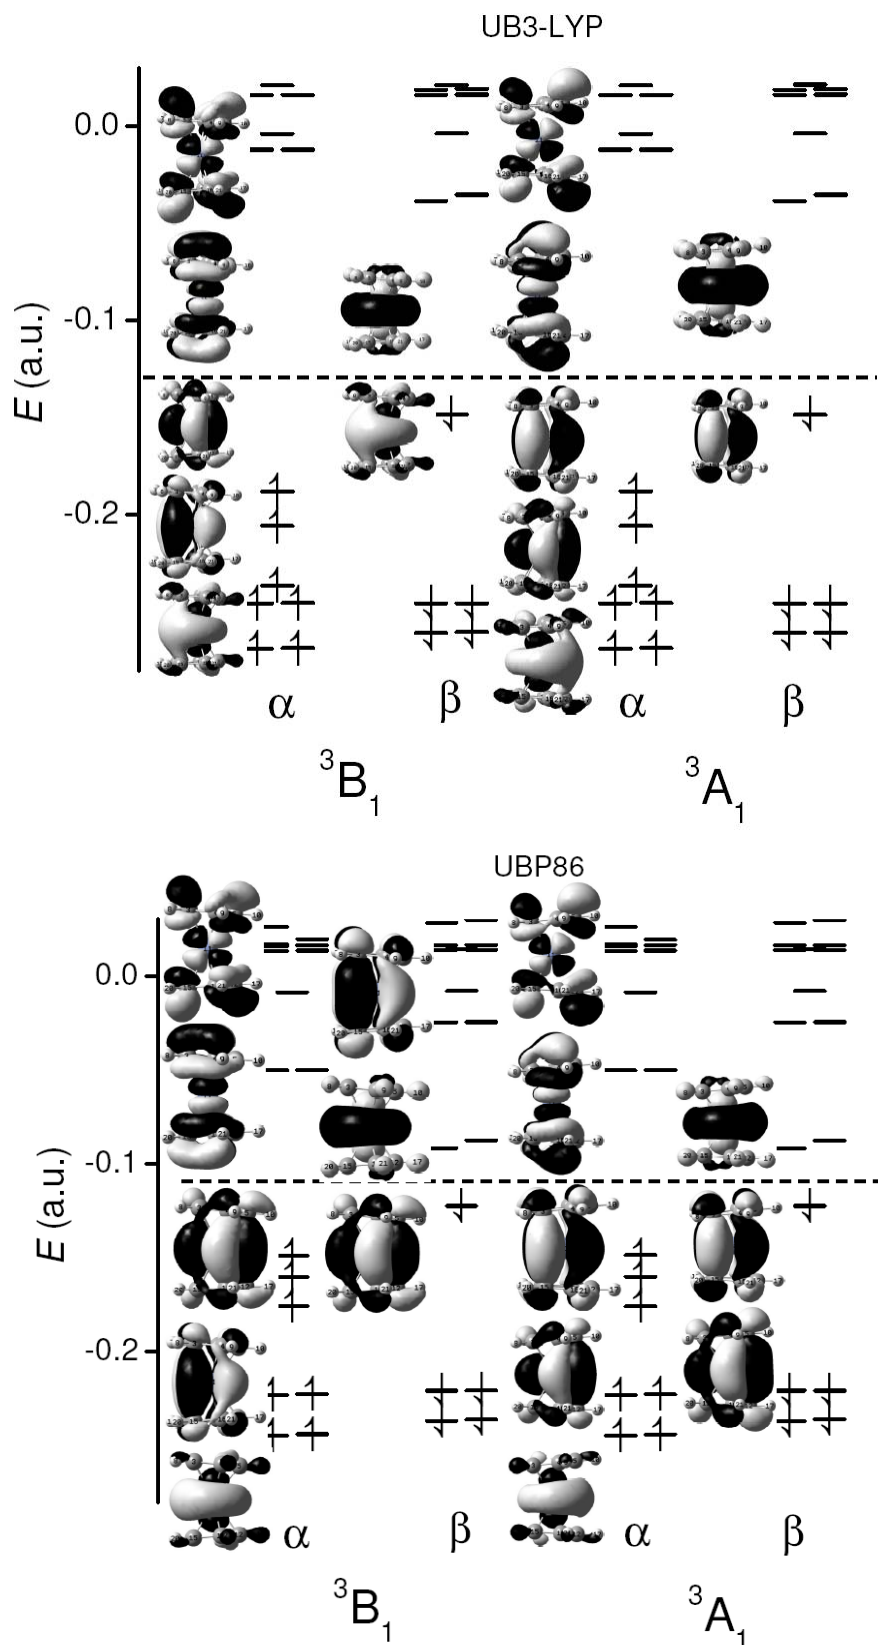

Figure S3. Molecular Kohn-Sham orbital energy level diagram for chromocene and sketches of its molecular orbitals at different level of calculations. Alpha orbitals surfaces reported: LUMO+1, LUMO, HOMO, HOMO-1, HOMO-2. Beta orbitals surfaces reported: LUMO, HOMO.

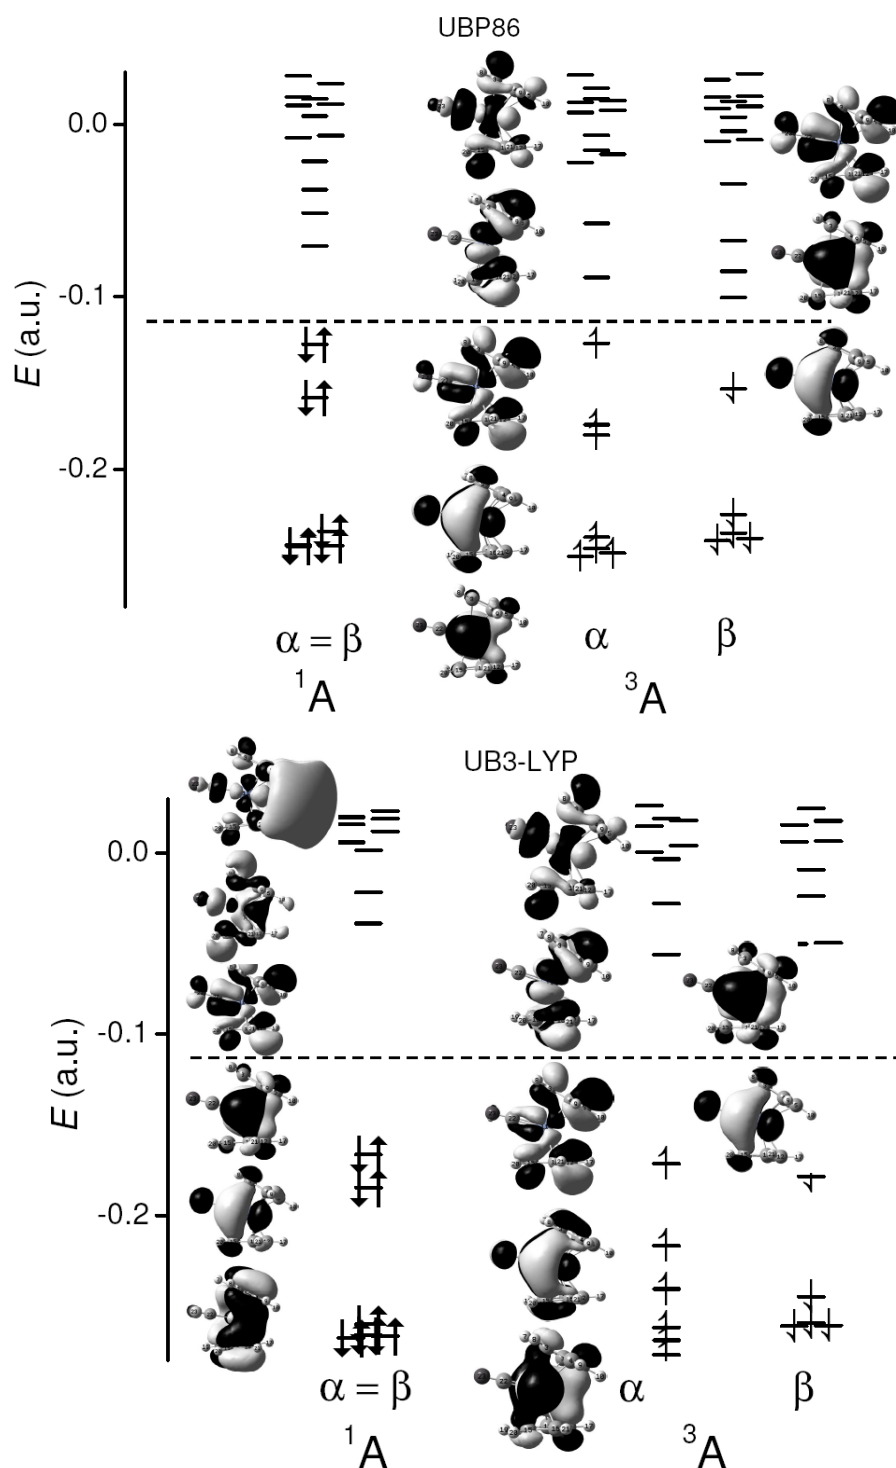

Figure S4. Molecular Kohn-Sham orbital energy level diagram for CO complex with chromocene and sketches of the molecular orbitals of the system. Alpha orbitals surfaces reported: LUMO+1, LUMO, HOMO, HOMO-1, HOMO-2. Beta orbitals surfaces reported: LUMO, HOMO.

Table S1. Structures and relative energies ( $\Delta E$ ) for the different chromocene conformers (triplet spin state). All the distances are reported in Å. The notation of the carbon atoms is that used Figure 3.

|                                                                  | Eclipsed $^3B$ |         | Staggered $^3B_{st}$ |         | Eclipsed $^3A$ |         | Staggered $^3A_{st}$ |         |
|------------------------------------------------------------------|----------------|---------|----------------------|---------|----------------|---------|----------------------|---------|
|                                                                  | UBP86          | UB3LYP  | UBP86                | UB3LYP  | UBP86          | UB3LYP  | UBP86                | UB3LYP  |
| Cr-Cp                                                            | 1.800          | 1.838   | 1.803                | 1.841   | 1.800          | 1.838   | 1.803                | 1.841   |
| Cr-C <sub>5</sub>                                                | 2.112          | 2.143   | 2.124                | 2.152   | 2.237          | 2.259   | 2.230                | 2.254   |
| Cr-C <sub>1</sub> (C <sub>4</sub> )                              | 2.155          | 2.182   | 2.160                | 2.186   | 2.194          | 2.218   | 2.192                | 2.218   |
| Cr-C <sub>2</sub> (C <sub>3</sub> )                              | 2.225          | 2.248   | 2.220                | 2.244   | 2.124          | 2.154   | 2.134                | 2.161   |
| C <sub>5</sub> -C <sub>1</sub> (C <sub>5</sub> -C <sub>4</sub> ) | 1.445          | 1.431   | 1.444                | 1.431   | 1.425          | 1.415   | 1.425                | 1.415   |
| C <sub>1</sub> -C <sub>2</sub> (C <sub>4</sub> -C <sub>3</sub> ) | 1.431          | 1.420   | 1.431                | 1.420   | 1.438          | 1.426   | 1.438                | 1.426   |
| C <sub>2</sub> -C <sub>3</sub>                                   | 1.422          | 1.413   | 1.422                | 1.413   | 1.447          | 1.433   | 1.446                | 1.432   |
| C <sub>5</sub> -H                                                | 1.0848         | 1.076   | 1.0851               | 1.0760  | 1.0864         | 1.077   | 1.0863               | 1.0771  |
| C <sub>1</sub> (C <sub>4</sub> )-H                               | 1.0853         | 1.076   | 1.0854               | 1.0763  | 1.0858         | 1.077   | 1.0858               | 1.0766  |
| C <sub>2</sub> (C <sub>3</sub> )-H                               | 1.0862         | 1.077   | 1.0861               | 1.0770  | 1.0849         | 1.076   | 1.0852               | 1.0761  |
| $\angle$ Cp,H (°)                                                | -2.744         | 2.400   | -2.491               | -2.220  | 2.828          | 2.371   | 2.996                | 177.499 |
| $\angle$ Cp-Cr-Cp (°)                                            | 177.742        | 178.773 | 179.998              | 179.993 | 177.816        | 178.783 | 180.000              | 179.996 |
| $\Delta E$ (kJ/mol)                                              | 0              | 0       | 2.6635               | 1.5938  | 0.0087         | -0.0016 | 2.6570               | 1.5925  |

Cr-Cp denotes the distance from the metal atom to the center of cyclopentadienyl ring.  $\angle$ Cp,H denotes the angle of the C<sub>5</sub>-H bond out of the cyclopentadienyl ring; this angle is defined to be positive when the C-H bonds are bent toward the metal atom.  $\angle$ Cp-Cr-Cp is the angle between the Cr atom and the center of the centers of mass of the two cyclopentadienyl rings. Positive values of  $\Delta E$  indicate a lower stability.

Even if the difference in energy is almost inexistent, the geometry of the  $^3A$  and  $^3B$  states is quite different: in particular, the tilt of the two Cp rings with respect to the D<sub>5h</sub> symmetry (perfectly parallel Cp rings) is opposite in the two cases. Moreover, in the  $^3B$  conformer the most near C atoms belonging to differ rings are the two tops of the pentagons (C<sub>5</sub> and C<sub>12</sub> atoms in Figure 3), whereas in the  $^3A$  conformer they are the most far. The larger the C-Cr distance (i.e. the local distance between the Cp rings), the smaller the corresponding C-C bonds; as a consequence, the succession of the C-C bonds in the rings results to be completely reversed in the  $^3A$  and  $^3B$  conformers. Among them, the  $^3B$  geometry seems to be more suitable to interact with incoming molecules.

Conversely, in the  $^3A_{st}$  and  $^3B_{st}$  conformers the Cp rings are almost perfectly parallel each other (all the Cp-Cr-Cp angles of 180°), although a little slipping, along the C<sub>5</sub>CrC<sub>12</sub> plane in the  $^3A_{st}$  conformer and along the plane passing through C<sub>1</sub> and C<sub>4</sub> and orthogonal to it in the  $^3B_{st}$  conformer, exists. Also in the staggered case, an inverse succession of the C-C bonds is observed in the Cp rings of the two conformers.
